# Supplementary material for: Machine learning based gray-level co-occurrence matrix early warning system enables accurate detection of colorectal cancer pelvic bone metastases on MRI
Source: PubMed Central journal article supplement (PMC10073745; doi:10.3389/fonc.2023.1121594), 2023-03-22
Supplement: Image_2.pdf [file Image_2.pdf]

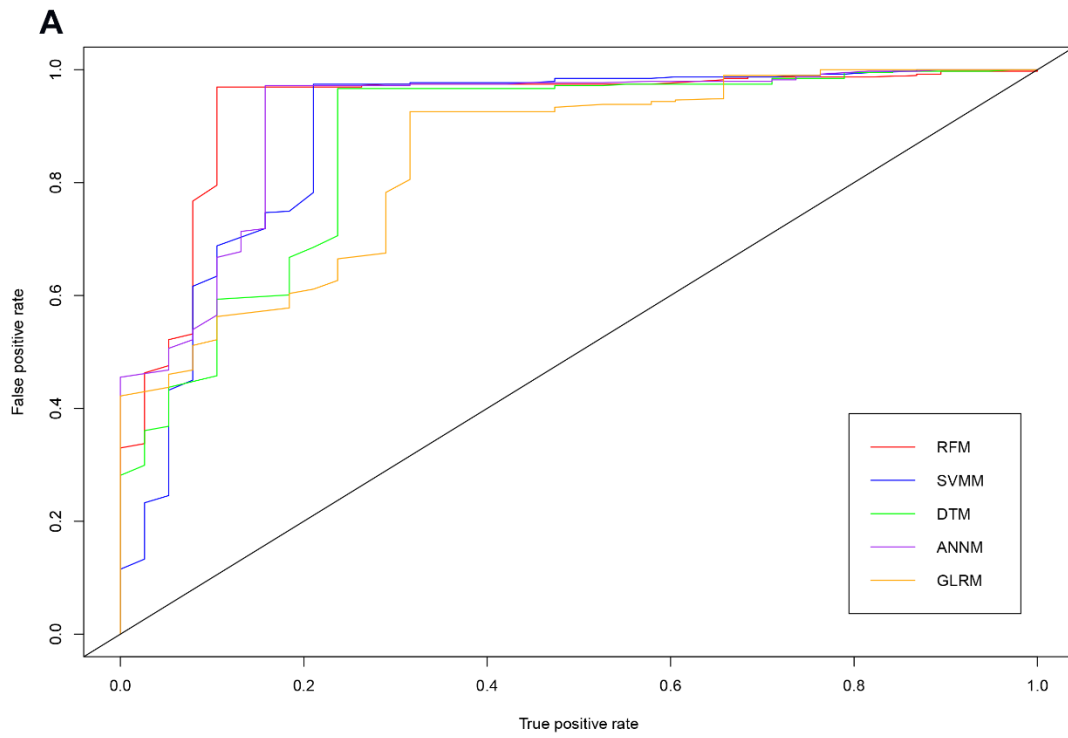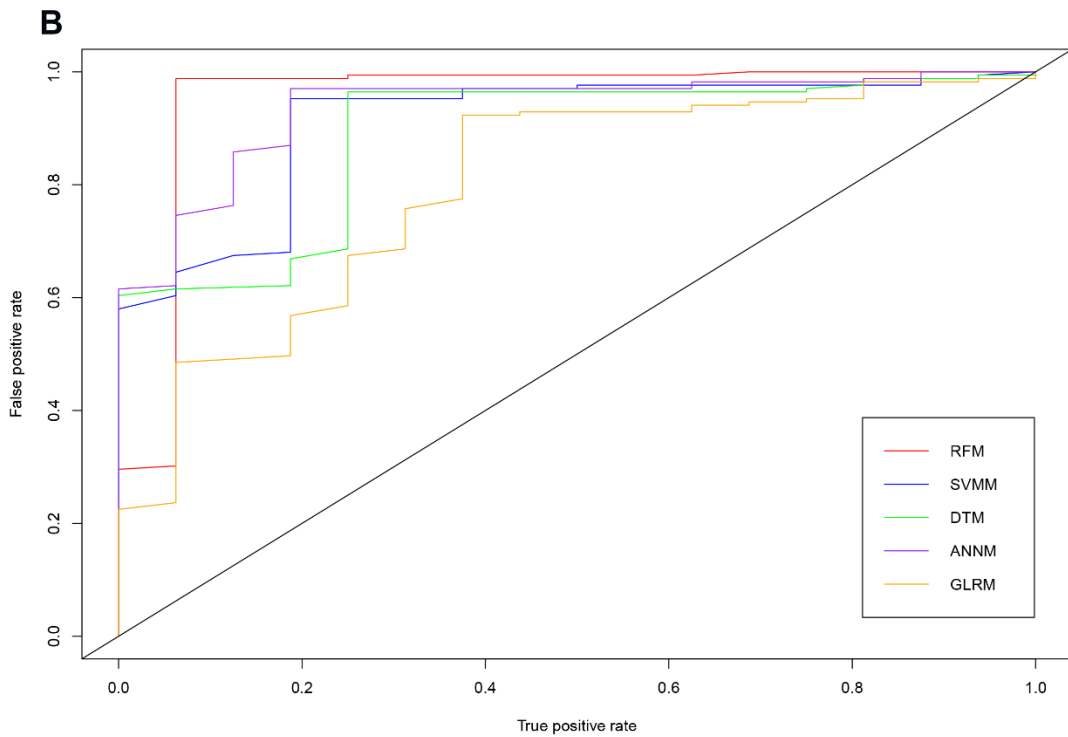

Supplementary Figure 2. ROC curve evaluation of five prediction models.A.Train set;B.Validation set.
