# Supplementary material for: Machine learning based gray-level co-occurrence matrix early warning system enables accurate detection of colorectal cancer pelvic bone metastases on MRI
Source: PubMed Central journal article supplement (PMC10073745; doi:10.3389/fonc.2023.1121594), 2023-03-22
Supplement: Image_3.pdf [file Image_3.pdf]

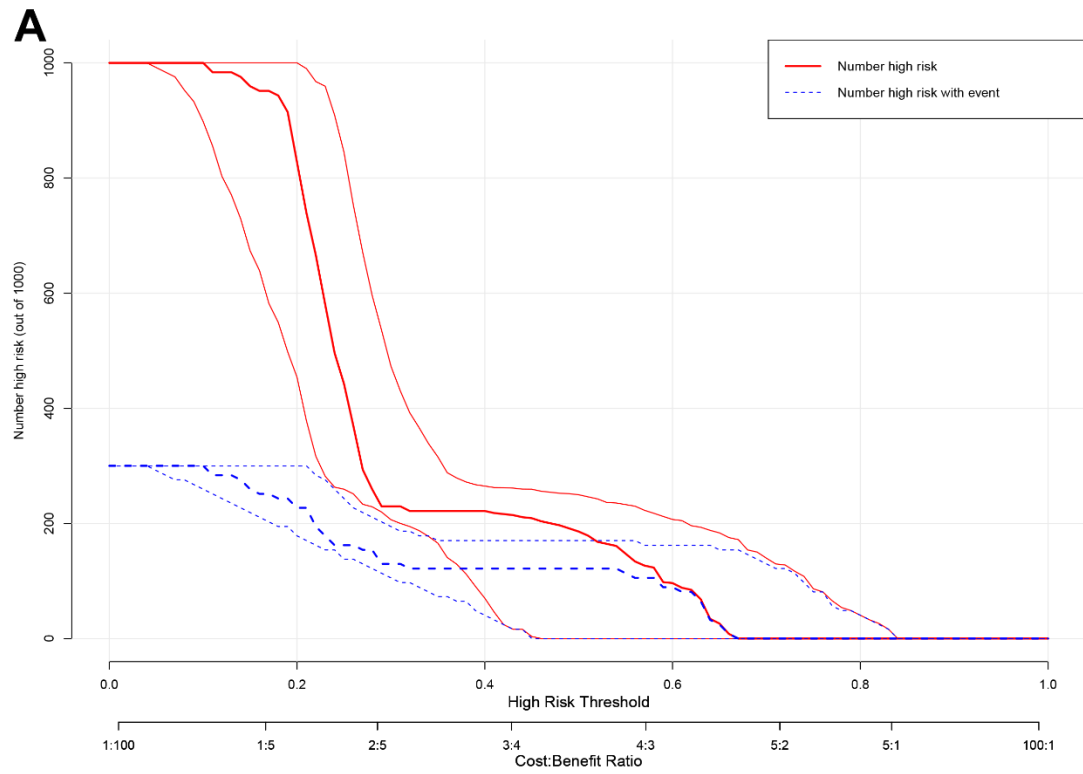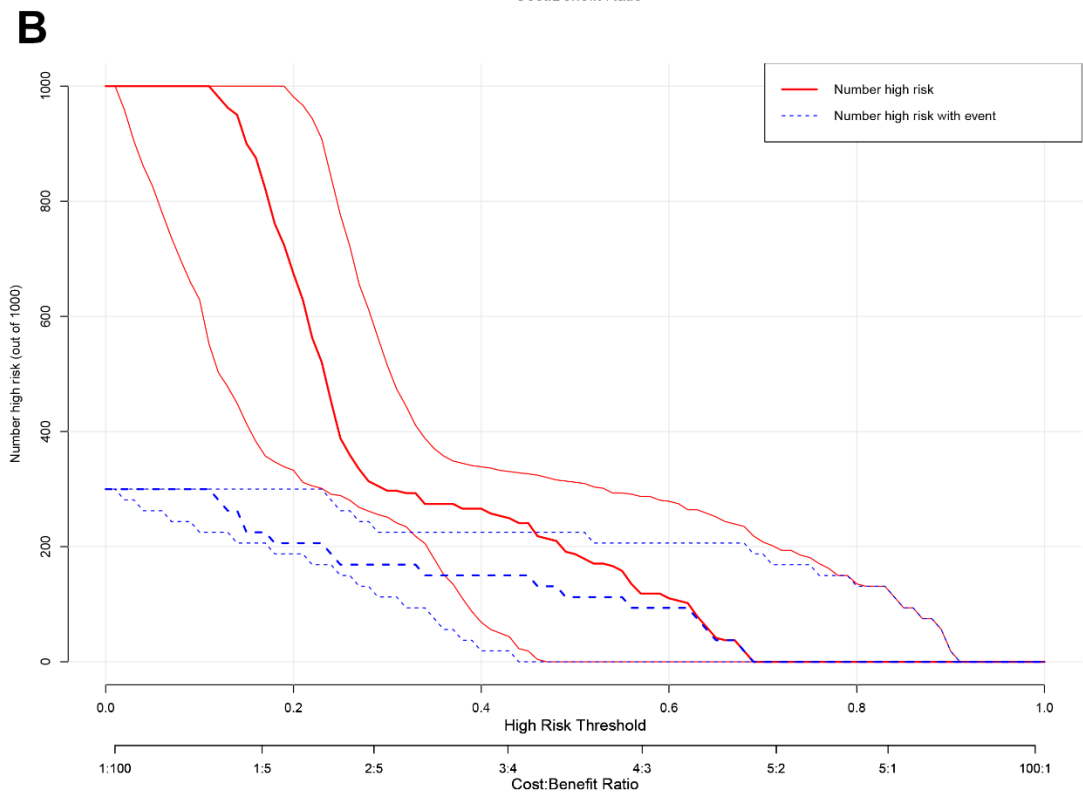

Supplementary Figure3. Identification ability of patients with bone metastasis based on CIC evaluation of RFM.A. Training Set;B. Internal validation set.
